# Supplementary material for: Poly-glutamine-dependent self-association as a potential mechanism for regulation of androgen receptor activity
Source: PubMed Central journal article supplement (PMC8730435; doi:10.1371/journal.pone.0258876), 2022-01-05

**A**

|                      |                   |                   |            |            |
|----------------------|-------------------|-------------------|------------|------------|
| <b>1</b> -MEVQLGLGRV | YPRPPSKTYR        | GAFQNLFQSV        | REVIQNPGR  | HPEAASAAPP |
| GASLLLL <b>QQQ</b>   | <b>QQQQQQQQQQ</b> | <b>QQQQQQQQQQ</b> | ETSPRQQQQQ | QGEDGSPQAH |
| RRGPTGYLVL           | DEEQQPSQPQ        | SALECHPERG        | CVPEPGAAVA | ASKGLPQQLP |
| APPDEDDSA            | PSTLSLLGPT        | FPGLSSCSAD        | LKDILSEAST | MQLLQQQQQE |
| AVSEGSSSGR           | AREASGAPTS        | SKDNYLGGTS        | TISDNAKELC | KAVSVSMGLG |
| VEALEHLSPG           | EQLRGDCMYA        | PLLGVPFAVR        | PTPCAPLAEC | KGSLLDDSAG |
| KSTEDTAEYS           | PFKGGYTKGL        | EGESLGCSGS        | AAAGSSGTLE | LPSTLSLYKS |
| GALDEAAAYQ           | SRDYYNFPLA        | LAGPPPPPPP        | PHPHARIKLE | NPLDYGSAWA |
| AAAQCRYGD            | LASLHGAGAA        | GPGSGSPSAA        | ASSSWHTLFT | AEEGQLYGPC |
| GGGGGGGGGG           | GGGGGGGGGG        | GGGEAGAVAP        | YGYTRPPQGL | AGQESDFTAP |
| DVWYPGMVS            | RVPYPSPTCV        | KSEMGPWMS         | YSGPYGDMRL | ETARDHVLPI |
| DYYFPPQKT            | <b>-559</b>       |                   |            |            |

**B****AR**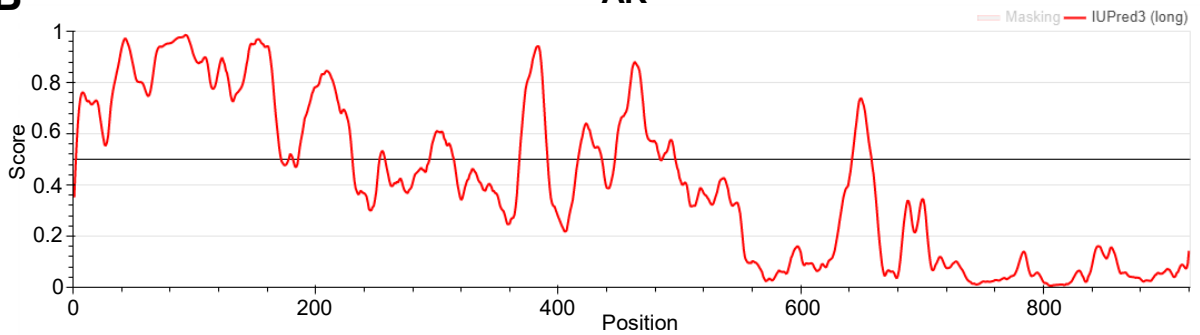**C****KDM4A**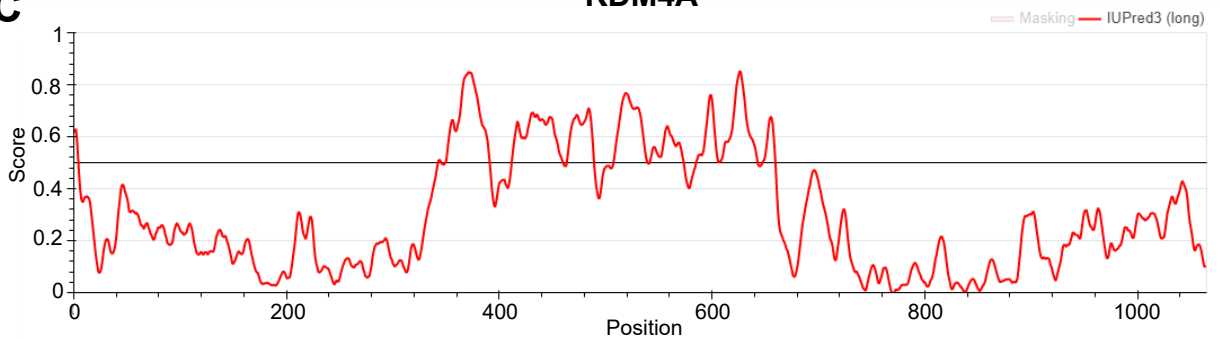

Supplement: pone.0258876.s001.pdf [file pone.0258876.s001.pdf]
