# Supplementary material for: Poly-glutamine-dependent self-association as a potential mechanism for regulation of androgen receptor activity
Source: PubMed Central journal article supplement (PMC8730435; doi:10.1371/journal.pone.0258876), 2022-01-05
Supplement: pone.0258876.s002.pdf [file pone.0258876.s002.pdf]

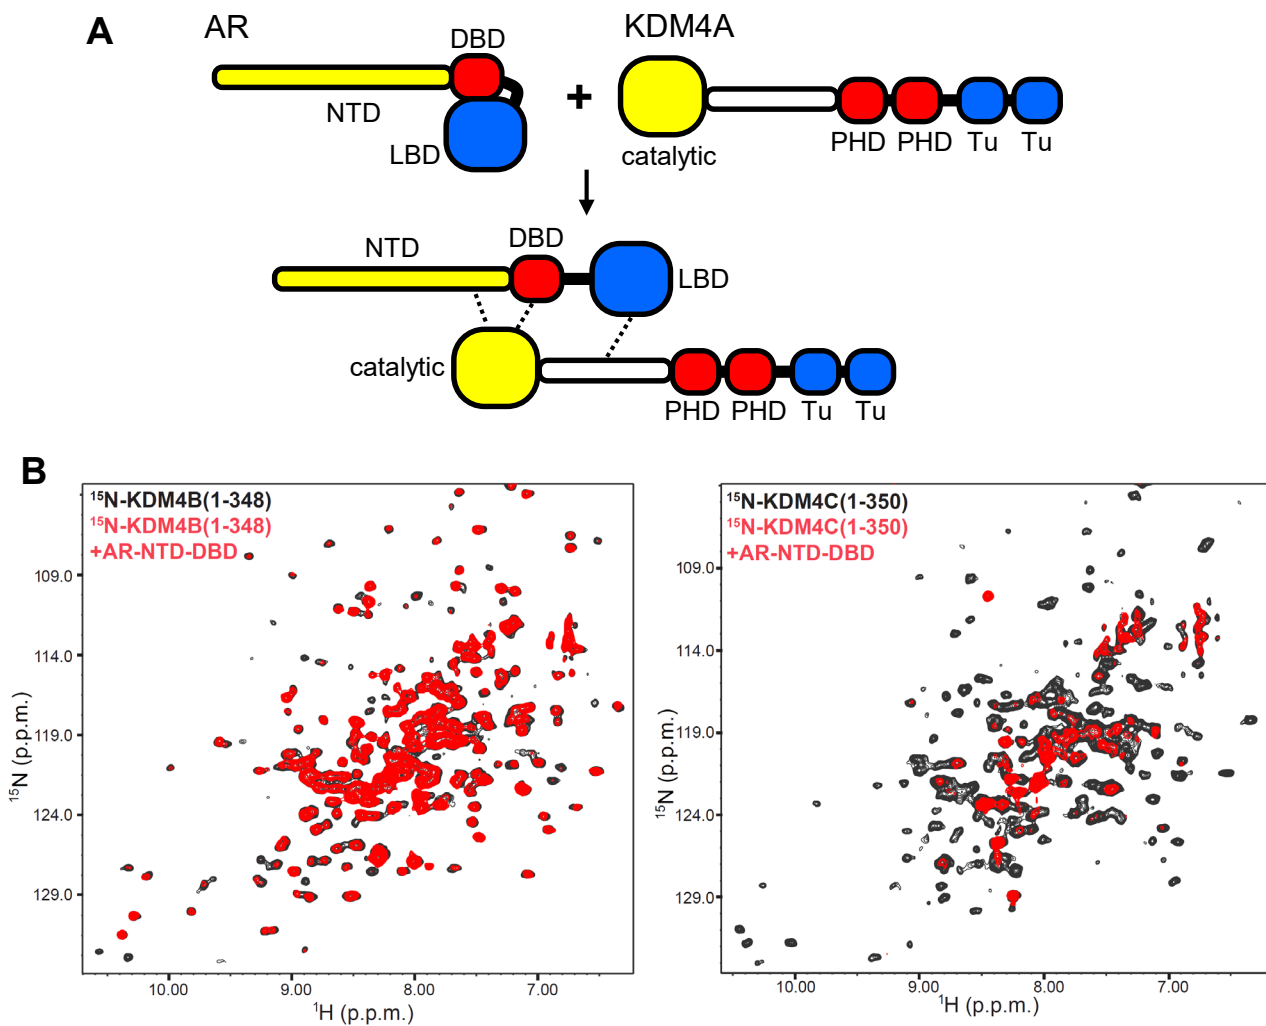

**S2 Fig**  
 Roggero et al.
