# Supplementary material for: Poly-glutamine-dependent self-association as a potential mechanism for regulation of androgen receptor activity
Source: PubMed Central journal article supplement (PMC8730435; doi:10.1371/journal.pone.0258876), 2022-01-05
Supplement: pone.0258876.s003.pdf [file pone.0258876.s003.pdf]

**AR1-559 12Q**

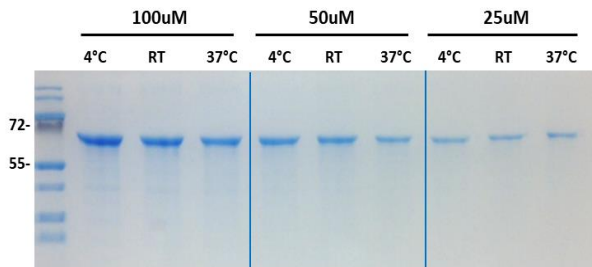

**AR1-559 20Q**

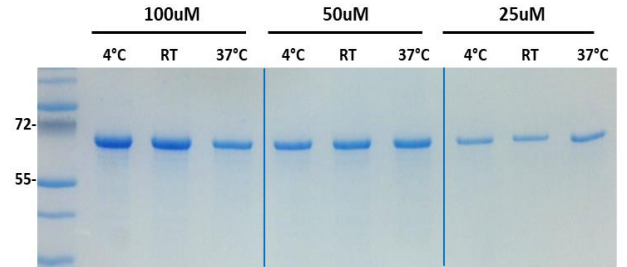

**AR1-559 31Q**

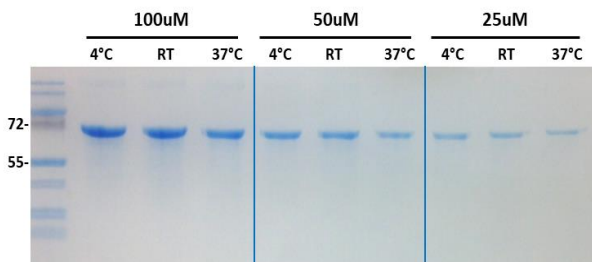

**AR1-559 49Q**

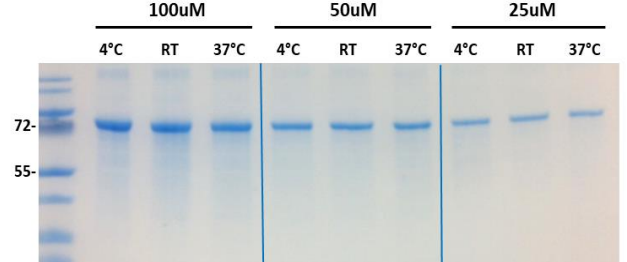

**S3 Fig**  
**Roggero et al.**
