# Supplementary material for: Poly-glutamine-dependent self-association as a potential mechanism for regulation of androgen receptor activity
Source: PubMed Central journal article supplement (PMC8730435; doi:10.1371/journal.pone.0258876), 2022-01-05

**Figure 3B**

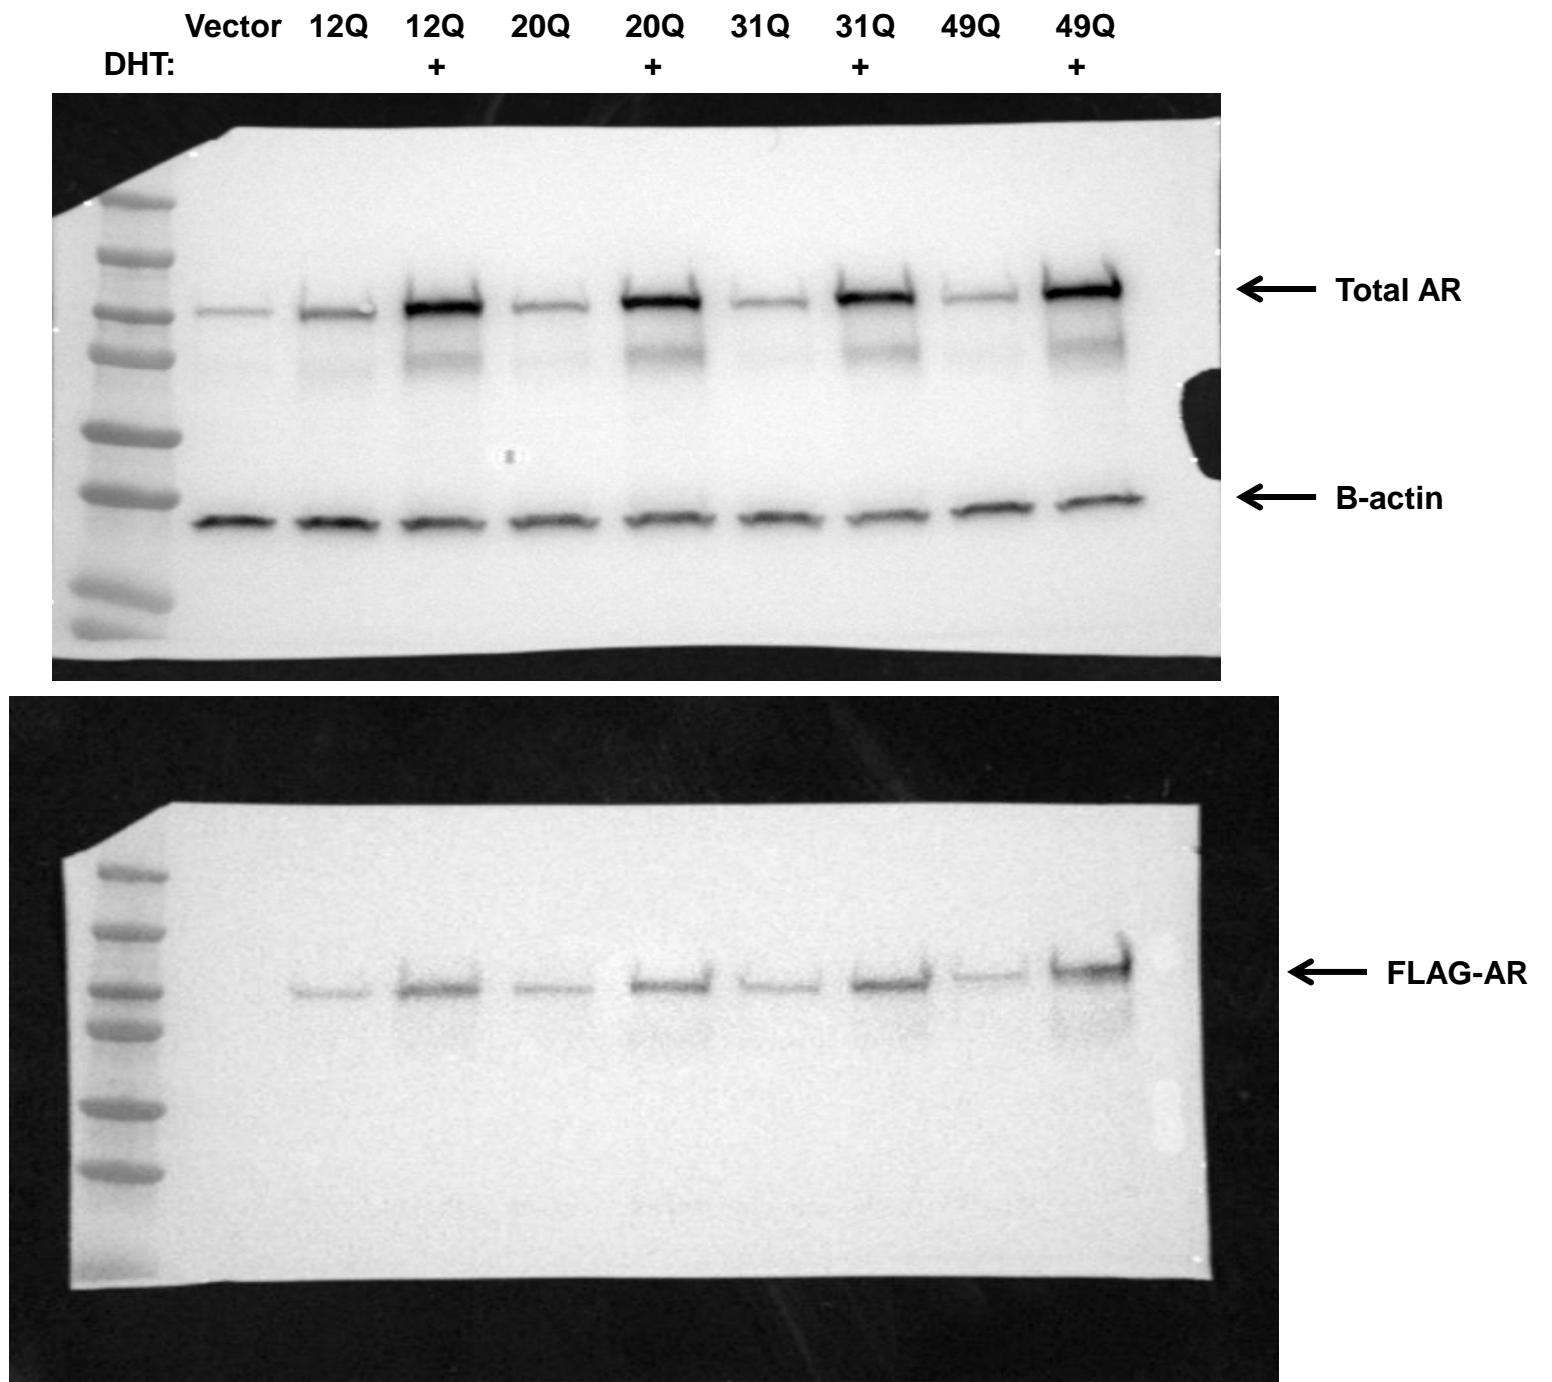

Figure 4C

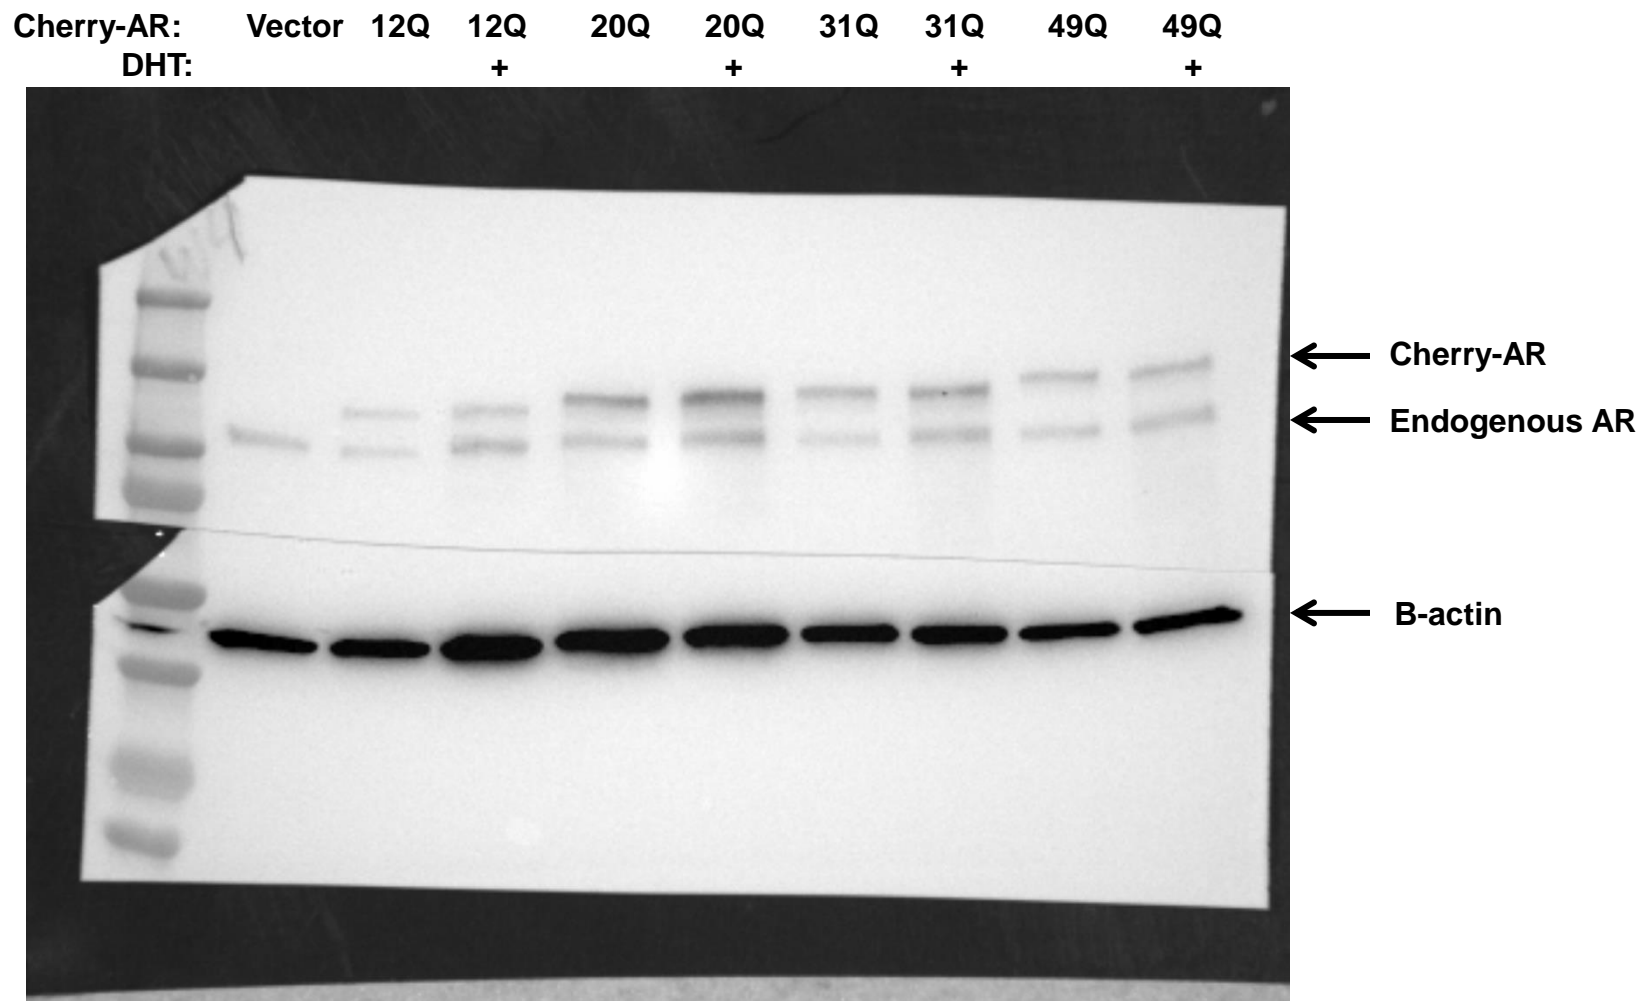

### S3 Fig

AR1-559 12Q

100uM      50uM      25uM  
4°C RT 37°C   4°C RT 37°C   4°C RT 37°C

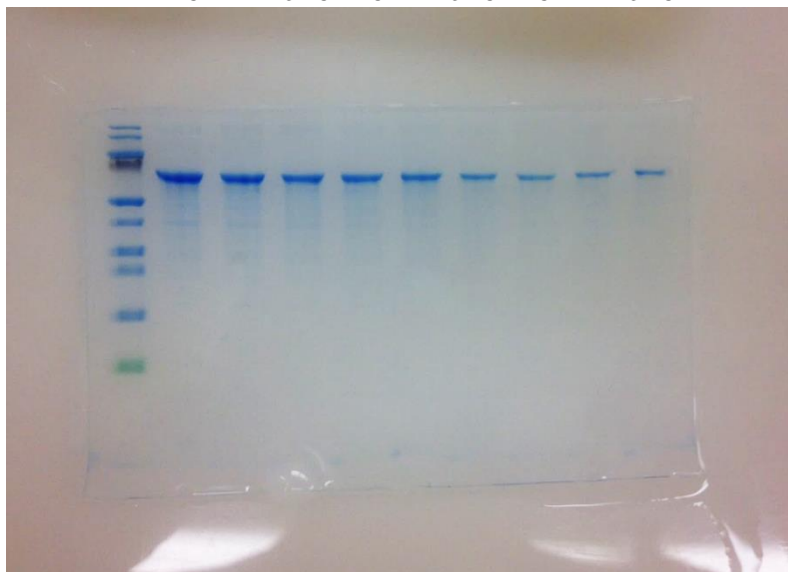

AR1-559 20Q

100uM      50uM      25uM  
4°C RT 37°C   4°C RT 37°C   4°C RT 37°C

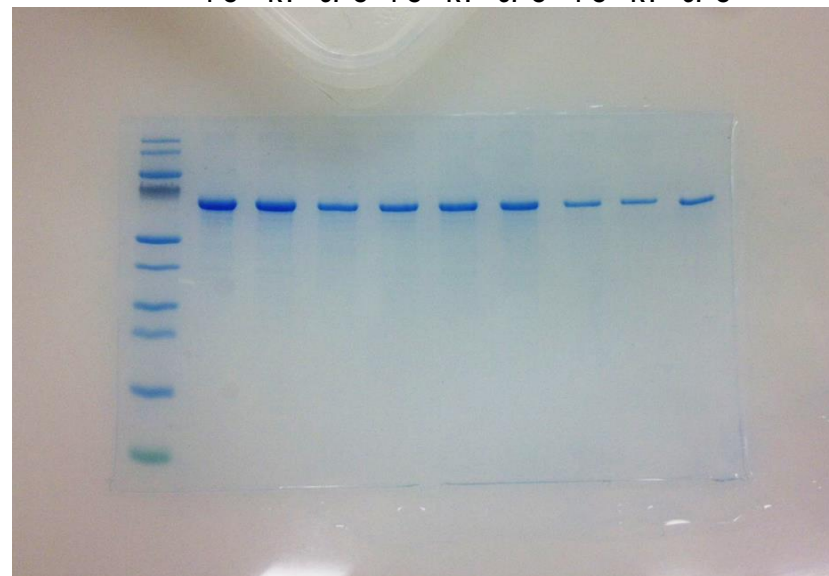

AR1-559 31Q

100uM      50uM      25uM  
4°C RT 37°C   4°C RT 37°C   4°C RT 37°C

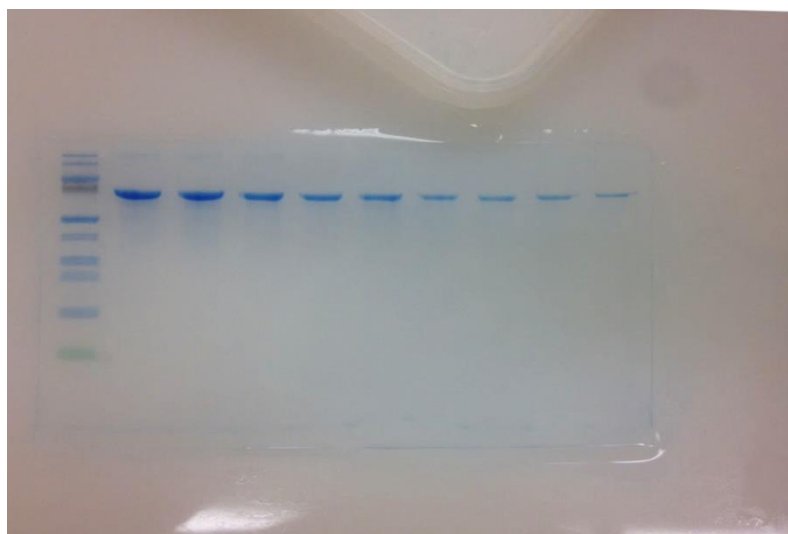

AR1-559 49Q

100uM      50uM      25uM  
4°C RT 37°C   4°C RT 37°C   4°C RT 37°C

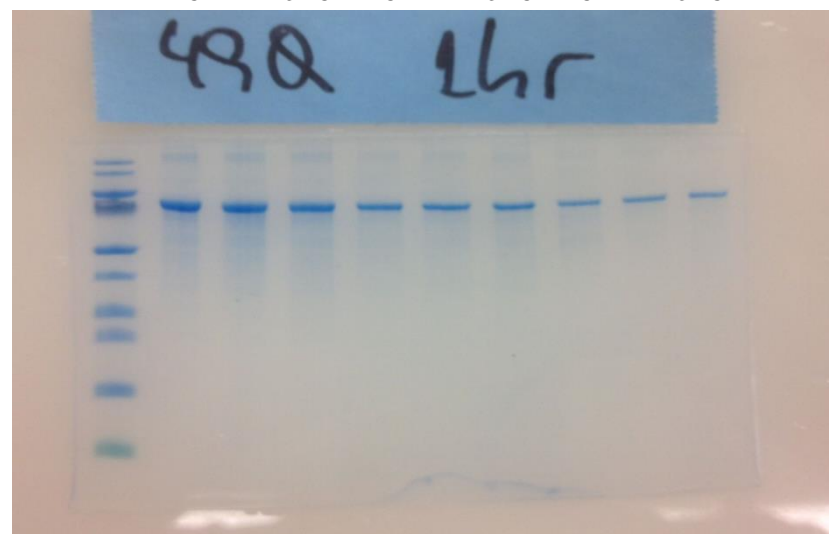

Supplement: pone.0258876.s004.pdf [file pone.0258876.s004.pdf]
